# Supplementary material for: Ranunculus sceleratus as a Model Species to Decrypt the Role of Ethylene in Plant Adaptation to Salinity
Source: MDPI journal article supplement (doi:10.3390/plants12020370), 2023-01-12
Supplement: s1 [file s1]

# ***Ranunculus sceleratus* as a Model Species to Decrypt the Role of Ethylene in Plant Adaptation to Salinity**

Veronika Prokopoviča and Gederts Ievinsh

**Supplementary Table S1.** Results of ANOVA analysis of experimental data.

| Experiment                             | Parameter                                        | DF | F     | p        |
|----------------------------------------|--------------------------------------------------|----|-------|----------|
| Experiment 1                           | Petiole length                                   | 5  | 42.6  | < 0.0001 |
|                                        | Na <sup>+</sup> concentration on dry mass basis  | 11 | 265.4 | < 0.0001 |
|                                        | Na <sup>+</sup> concentration on dry water basis | 11 | 38.6  | < 0.0001 |
|                                        | K <sup>+</sup> concentration on dry mass basis   | 11 | 34.0  | < 0.0001 |
|                                        | K <sup>+</sup> concentration on dry water basis  | 11 | 3.1   | 0.011    |
| Calibration of the experimental system | Petiole length (silica xerogel)                  | 4  | 5.0   | 0.004    |
|                                        | Petiole length (ethylene)                        | 6  | 57.4  | < 0.0001 |
|                                        | Petiole water content (ethylene)                 | 6  | 68.8  | < 0.0001 |
| Experiment 2                           | Petiole length                                   | 9  | 26.0  | < 0.0001 |
|                                        | Petiole dry mass                                 | 9  | 6.1   | < 0.0001 |
|                                        | Blade dry mass                                   | 9  | 5.8   | < 0.0001 |
|                                        | Petiole water content                            | 9  | 17.8  | < 0.0001 |
|                                        | Blade water content                              | 9  | 10.8  | < 0.0001 |
|                                        | Stem water content                               | 9  | 122.7 | < 0.0001 |
|                                        | Na <sup>+</sup> concentration in petiole         | 9  | 162.6 | < 0.0001 |
|                                        | Na <sup>+</sup> concentration in blade           | 9  | 96.2  | < 0.0001 |
|                                        | Na <sup>+</sup> concentration in stem            | 9  | 28.7  | < 0.0001 |
|                                        | K <sup>+</sup> concentration in petiole          | 9  | 53.7  | < 0.0001 |
|                                        | K <sup>+</sup> concentration in blade            | 9  | 16.7  | < 0.0001 |
|                                        | K <sup>+</sup> concentration in stem             | 9  | 125.3 | < 0.0001 |
|                                        | Electrical conductivity in petiole               | 9  | 33.3  | < 0.0001 |
|                                        | Electrical conductivity in blade                 | 9  | 40.4  | < 0.0001 |
|                                        | Electrical conductivity in stem                  | 9  | 47.2  | < 0.0001 |

**Supplemmentary Figure S1.** Characteristic morphology of *Ranunculus sceleratus* plants cultivated at high humidity (A) and normal humidity (B). Plants were cultivated in closed 48 L (high humidity) and 24 L (normal humidity, with desiccation) containers for 6 days. Containers were ventilated for 1 h and new C<sub>2</sub>H<sub>4</sub> and 1-methylcyclopropene (MCP) releasing solutions were replaced every day.

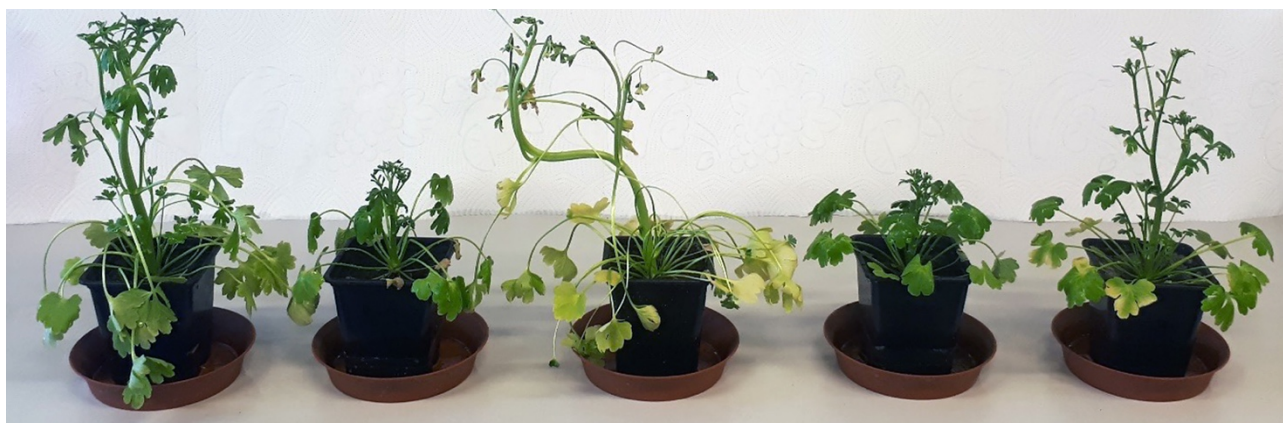

A, at high humidity. From left to right: control, NaCl, NaCl + C<sub>2</sub>H<sub>4</sub>, NaCl + MCP, NaCl + C<sub>2</sub>H<sub>4</sub> + MCP.

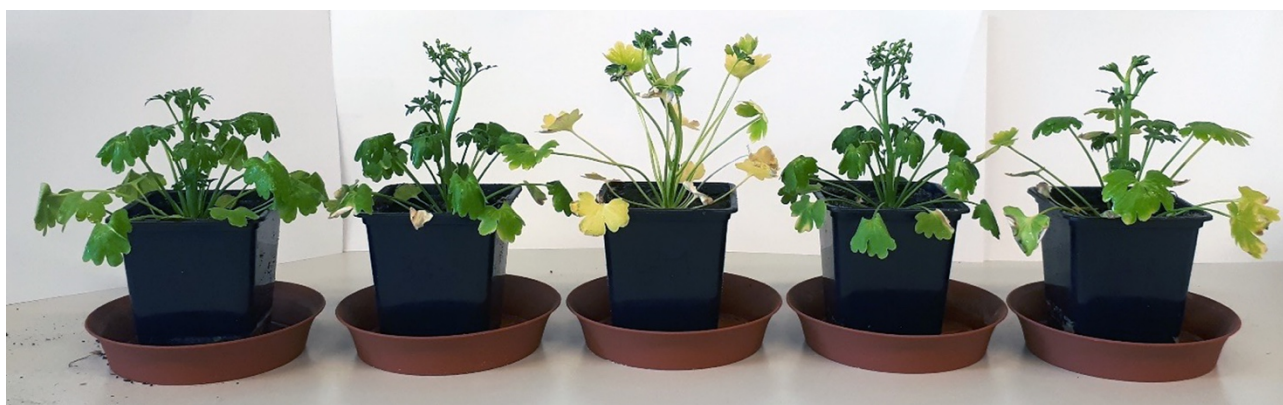

B, at normal humidity. From left to right: control, NaCl, NaCl + C<sub>2</sub>H<sub>4</sub>, NaCl + MCP, NaCl + C<sub>2</sub>H<sub>4</sub> + MCP.
